# Supplementary material
Source: PubMed Central journal article supplement (PMC3289310)
Supplement: 1116559109_pnas.201116559SI.pdf [file 1116559109_pnas.201116559SI.pdf]

# Supporting Information

Navascués et al. 10.1073/pnas.1116559109

## SI Materials and Methods

**Chemicals and Biochemicals.** Nitronium tetrafluoroborate ( $\text{NO}_2\text{BF}_4$ ), desferrioxamine (DFO), and Mb from equine skeletal muscle were purchased from Sigma-Aldrich. Protein standards for molecular mass determination were from Bruker Daltonics. Hemin (Fe-protoporphyrin IX chloride) and mesoheme (Fe-mesoporphyrin IX chloride) were from Livchem; 3-morpholinopyridone hydrochloride (SIN-1) was from Calbiochem. Hydroxylapatite (Bio-Gel HTP) and Chelex resin were from Bio-Rad; DE-52 from Whatman; Sephadex G-75, PD-10, and HisTrap Chelating columns from GE Healthcare; and ampholytes from Serva. All other chemicals and biochemicals, except as otherwise stated, were from Sigma-Aldrich.

**Purification of Leghemoglobins, Protein Identification, and Molecular Mass Determination.** Nodule soluble extracts were subjected to ammonium sulfate precipitation (35–90%) and leghemoglobins (Lbs) were purified by successive chromatographic steps in hydroxylapatite, Sephadex G-75, and DE-52 columns (1, 2). Anion-exchange chromatography was developed isocratically with 20 mM Tris-HCl (pH 8.0) for elution of Lba and Lba<sub>m</sub>, and then with a linear gradient of 0–60 mM NaCl in the same buffer for elution of Lbc, Lbc<sub>m</sub>, Lbd, and Lbd<sub>m</sub> (1). The protein fractions were treated with ferricyanide and nicotinic acid to ensure complete conversion of Lbs into their ferric Lb-nicotinate complexes. These fractions were further purified on analytical or preparative isoelectric focusing (IEF) minigels containing 7.5% (wt/vol) acrylamide and 5% (vol/vol) ampholytes (pH 4–6) following published protocols (2). Soybean Lb protein bands (red or green) were excised from the IEF gels without staining and nicotinate removed by elution of proteins in 10 mM  $\text{NH}_4\text{HCO}_3$  (pH 9.2). Proteins were subjected to in-gel digestion with trypsin using a Digest MSPro (Intavis). Peptide and protein identification was performed by peptide mass fingerprinting in a MALDI-TOF instrument (Applied Biosystems) as previously described (3). For molecular mass determination, Lbs were eluted from IEF gel pieces overnight at 4 °C with 10 mM  $\text{NH}_4\text{HCO}_3$ , loaded on PD-10 minicolumns equilibrated with 1 mM  $\text{NH}_4\text{HCO}_3$ , and concentrated on Centricon-10 membranes (Amicon). Molecular masses were determined by MALDI-TOF/MS. Spectra were mass calibrated externally using a standard protein mixture and internally using the signals derived from spiked horse heart cytochrome c. For analysis, 1  $\mu\text{L}$  of the protein extracts and 2  $\mu\text{L}$  of matrix (sinapinic acid, 3 mg  $\text{mL}^{-1}$ ) were loaded on the MALDI plate using the sandwich method (4).

**Structural Analyses of Hemes and Hemoproteins. Mass spectrometry.** Low-energy  $\text{MS}^n$  ( $n = 1\text{--}5$ ) analyses of hemes were carried out by nESI-IT/MS<sup>n</sup> on a LCQ ion trap mass spectrometer (ThermoFisher). The spray voltage applied was 0.85 kV and the capillary temperature was 110 °C. For  $\text{MS}^n$  experiments, the isolation window was 3-Da wide and the relative collision energy was 25–50%. High-resolution MS analyses were performed on an ApexQe Fourier transform-ion cyclotron mass spectrometer

(Bruker Daltonics), equipped with a 7T actively shielded magnet. Ions were generated using a Combi MALDI-electrospray ionization (ESI) source. For the analysis, the ESI interface was used and a voltage of 4,500 V was applied to the needle, and a counter voltage of 300 V was applied to the capillary. Samples were prepared by adding a spray solution of 70:29.9:0.1 MeOH/ $\text{H}_2\text{O}$ /formic acid to a solution of the sample at a vol/vol ratio of 1–5% to give the best signal-to-noise ratio. Data acquisition and processing were performed using ApexControl (v2.0.0.) and DataAnalysis (v3.4) software, respectively, from Bruker Daltonics.

**NMR spectroscopy.**  $^1\text{H}$  NMR samples were prepared in  $\text{D}_2\text{O}$  containing 50 mM phosphate buffer (pH\* 7.2; uncorrected for the deuterium isotope effect) and 2 mM cyanide to ensure complete formation of the ferric Lb-cyano complexes. The entire protein sample available of each Lb was used ( $\sim 1$  mM of Lba and  $\sim 0.2$  mM of Lbc<sub>m</sub>). NMR spectra were collected at 30 °C with the proton chemical shifts referenced to residual water (HDO). 1D and Nuclear Overhauser and Exchange Spectroscopy (NOESY) spectra were obtained on a Bruker DRX-500 NMR spectrometer operating at 499.38-MHz proton Larmor frequency. The Water-Eliminated Fourier Transform (WEFT)-NOESY experiments used 160-ms relaxation delay and 190-ms recovery delay. The mixing time for the WEFT-NOESY experiments was 40 ms. All NOESY spectra were collected with 1,024 or 2,048 datapoints in  $t_2$  and with 256–512 blocks, in  $t_1$  with 512 scans per block for the Lba sample, and 2,048–4,096 scans/block for the Lbc<sub>m</sub> sample.

**Resonance Raman spectroscopy.** Resonance Raman (RR) spectra were recorded using a Jobin-Yvon U1000 spectrometer, equipped with a liquid nitrogen-cooled CCD detector (Spectrum One; Jobin-Yvon). Excitation at 413.1 nm (50 mW) was provided by an Innova Kr<sup>+</sup> laser (Coherent). The signal-to-noise ratios were improved by spectral collections of six cycles of 30-s accumulation time. The reported spectra were the results of averaging five to six single spectra. The spectral analysis was made using the Grams 32 software (Galactic Industries). The frequency precision was 0.5–1  $\text{cm}^{-1}$  for the most intense bands and 1.5–2  $\text{cm}^{-1}$  for the weakest bands.

**Production of Recombinant Soybean Lba.** To overproduce the protein, nodule RNA was reverse-transcribed and gene-specific primers (5'-CACCATGGTTGCTTTCAGT-3' and 5'-CTGCAATAGATACTAATTATGCCTTC-3'; the sequence underlined was required for directional cloning) were used to isolate a full-length cDNA clone in the Champion pET200/D-TOPO vector (Invitrogen). The construct, encoding an N-terminal His tag, was introduced into *Escherichia coli* BL21 (DE3) cells, which were grown in LB medium at 37 °C until an  $\text{OD}_{600}$  of 1.0 was reached. The recombinant protein was expressed by incubation of cells at 37 °C for 2 h with 0.1 mM isopropylthio- $\beta$ -D-galactoside and purified on a  $\text{Ni}^{2+}$  affinity column. The protein was fully oxidized with an excess of ferricyanide and extensively dialyzed against 20 mM phosphate buffer pH 7.0. The spectrum confirmed that Lba was in the aquo-ferric form.

1. Jun H-K, Sarath G, Wagner FW (1994) Detection and purification of modified leghemoglobins from soybean root nodules. *Plant Sci* 100:31–40.
2. Jun H-K, et al. (1994) Characteristics of modified leghemoglobins isolated from soybean (*Glycine max* Merr.) root nodules. *Plant Physiol* 104:1231–1236.
3. Casanovas A, Carrascal M, Abián J, López-Tejero MD, Llobera M (2009) Discovery of lipoprotein lipase pi isoforms and contributions to their characterization. *J Proteomics* 72:1031–1039.

4. Kempfner J, et al. (2009) Evaluation of matrix-assisted laser desorption/ionization (MALDI) preparation techniques for surface characterization of intact *Fusarium* spores by MALDI linear time-of-flight mass spectrometry. *Rapid Commun Mass Spectrom* 23: 877–884.

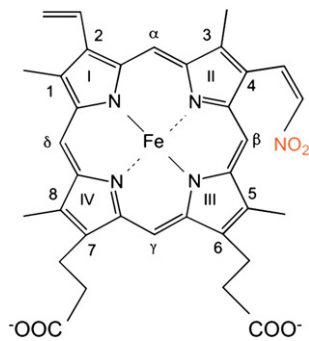

Fig. S1. Heme structure bearing a 4-nitrovinyl group. The isomer with the NO<sub>2</sub> group in the C $\beta$  atom and in *cis*-configuration is shown. Fisher’s numbering of protoporphyrin IX was followed.

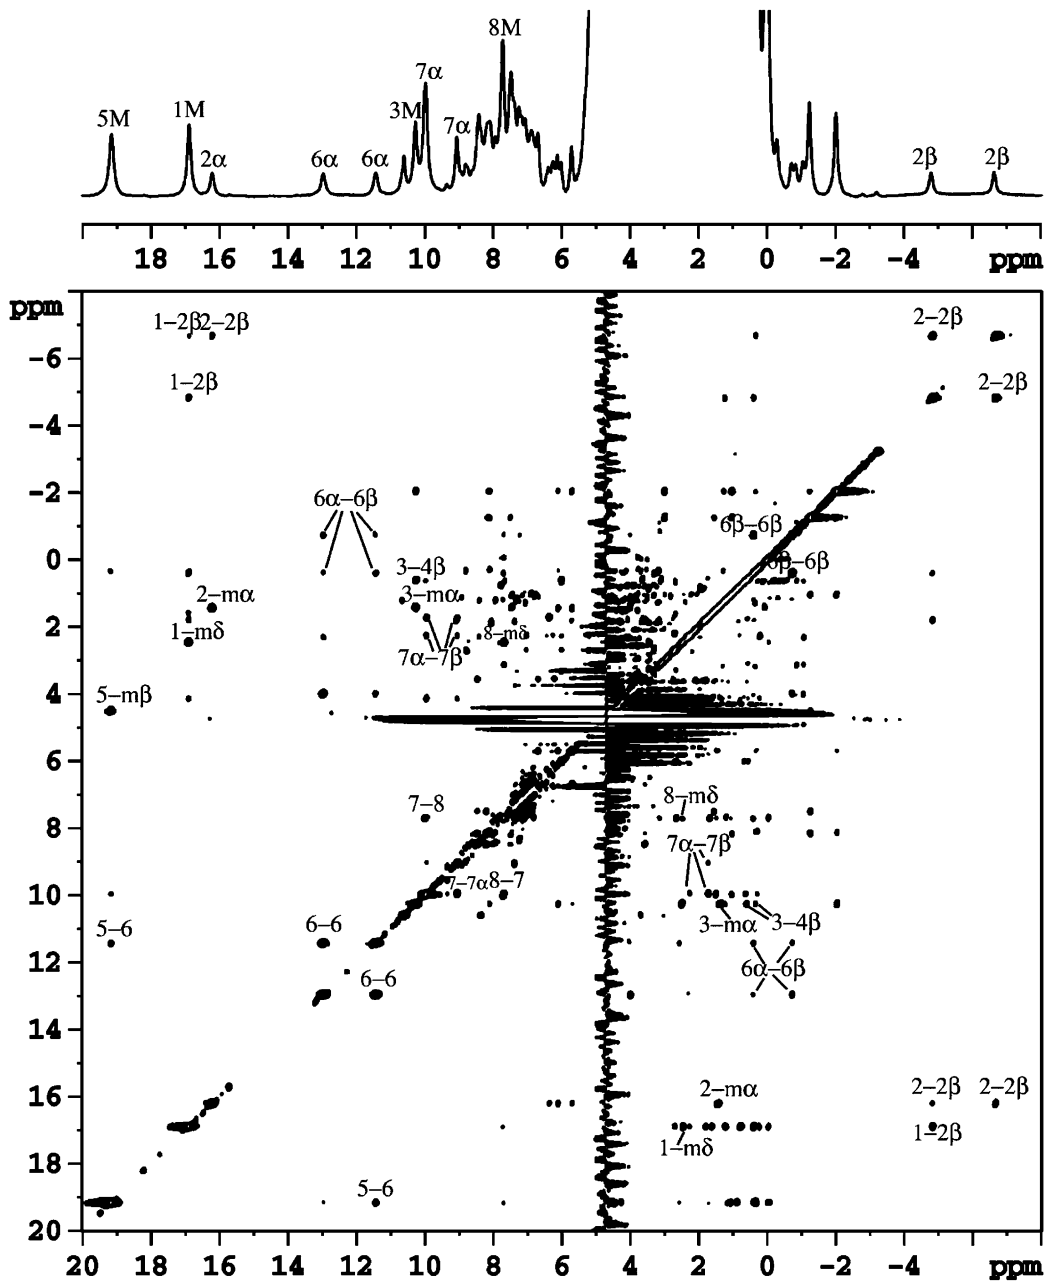

Fig. S2. 1D <sup>1</sup>H and WEFT-NOESY spectrum of the ferric Lba-cyanide complex (~1 mM), recorded at 500 MHz, pH\* 7.2, 30 °C.

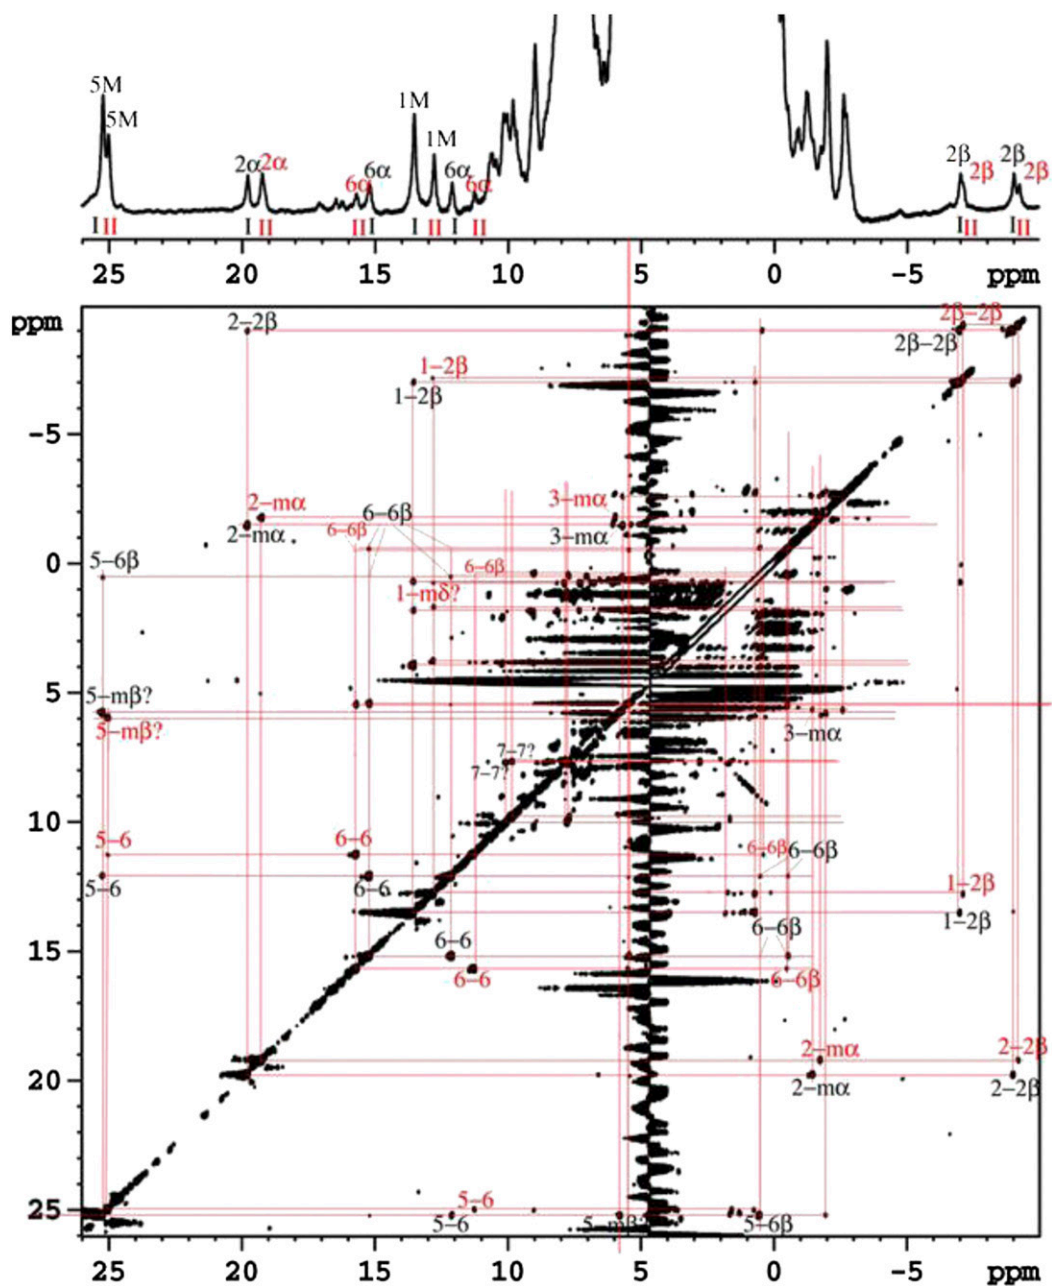

Fig. S3. 1D  $^1\text{H}$  and WEFT-NOESY spectrum of the ferric  $\text{Lbc}_m$ -cyanide complex ( $\sim 0.2$  mM), recorded at 500 MHz, pH\* 7.2, 30 °C. Two sets of proton resonances are marked in black and red and correspond to the isoproteins  $\text{Lbc}_{m1}$  and  $\text{Lbc}_{m2+c_{m3}}$ , although not necessarily in this order.

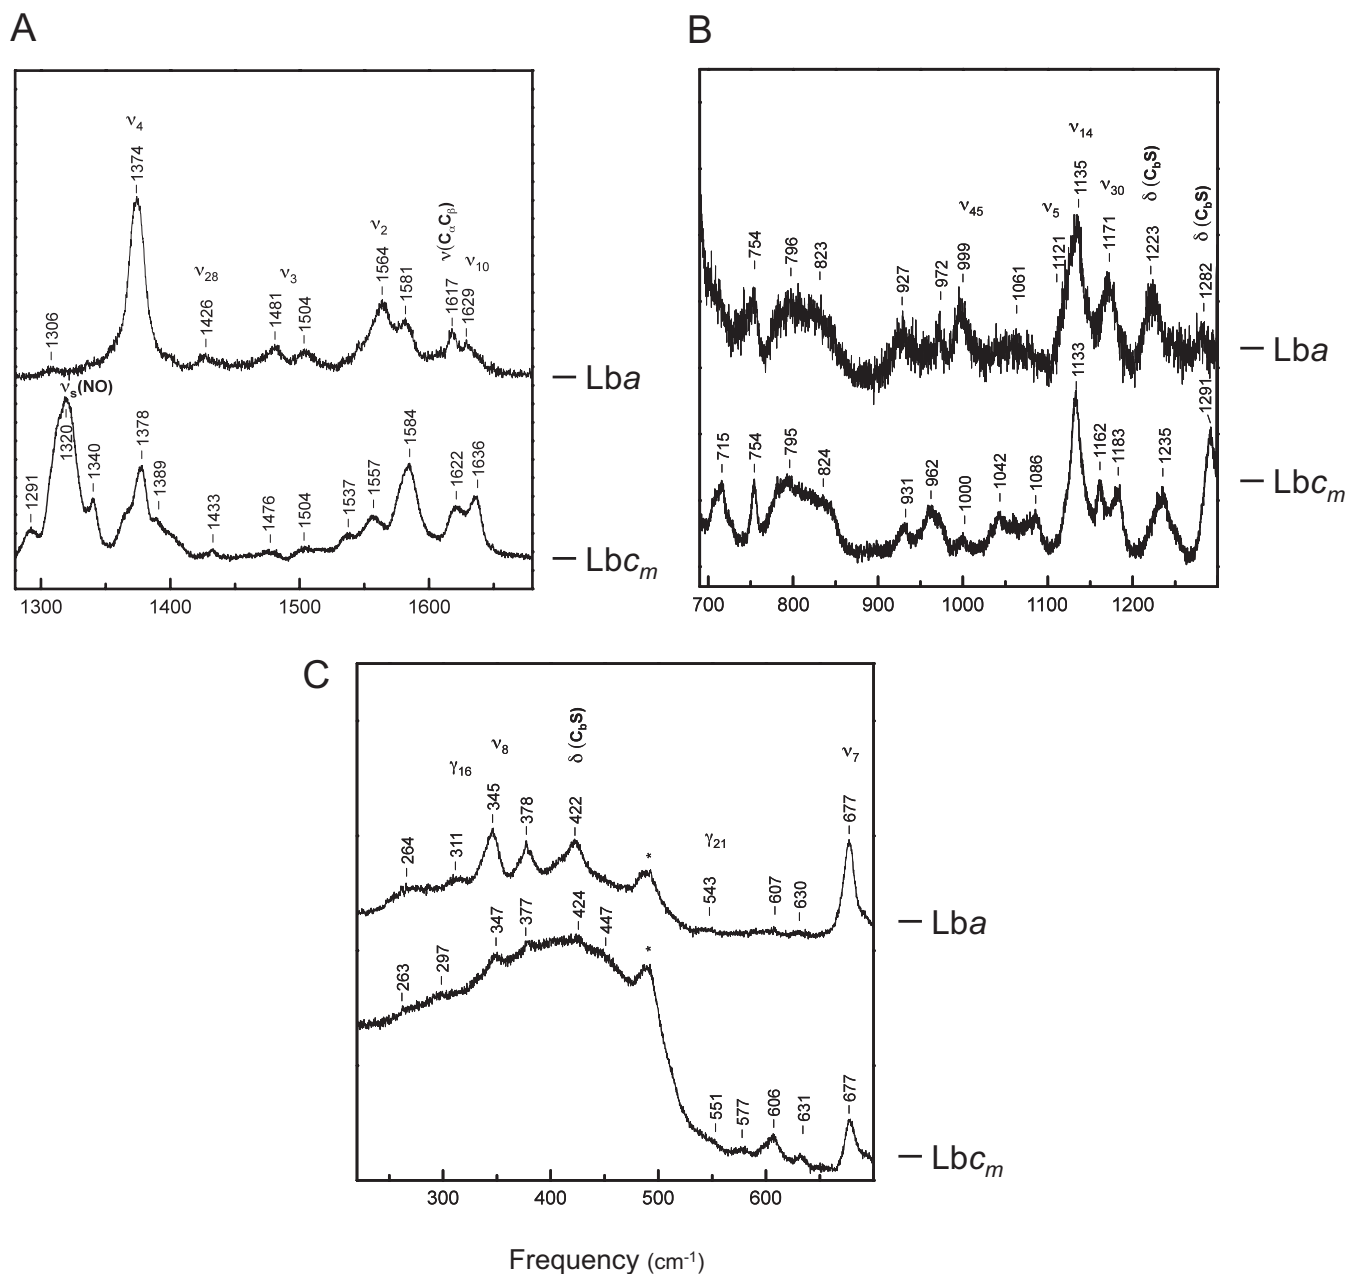

**Fig. 54.** (A) High- (1,280–1,700  $\text{cm}^{-1}$ ), (B) mid- (700–1,300  $\text{cm}^{-1}$ ), and (C) low- (230–700  $\text{cm}^{-1}$ ) frequency regions of RR spectra of ferric Lba and Lbc<sub>m</sub>, excited at 413.1 nm. (A) The major modification in the high-frequency spectra of Lbc<sub>m</sub> is the appearance of a strong band at 1,320  $\text{cm}^{-1}$ . This band corresponds to a symmetric stretching of  $\text{NO}_2$  [ $\nu_s(\text{NO})$ ] bound to ferriprotoheme. Modes of the porphyrin skeleton ( $\nu_2, \nu_3, \nu_4, \nu_{10}, \nu_{12}, \nu_{28}$ ) were shifted, indicating an effect on the tetrapyrrole geometry (1, 2). The stretching mode of the  $-\text{C}_\alpha=\text{C}_\beta$  vinyl bonds seen at 1,617  $\text{cm}^{-1}$  for Lba was apparently upshifted for Lbc<sub>m</sub>, forming a broad band at 1,622  $\text{cm}^{-1}$  (2). (B) Bands detected in the 900–1,300  $\text{cm}^{-1}$  region were assigned to stretching or deformation modes of the peripheral  $\text{C}_\beta(\text{pyrrole})$ -substituent bonds ( $\text{C}_\beta-\text{S}$ ) [ $\nu_5, \nu_{14}, \nu_{30}, \nu_{45}, \delta(\text{C}_\beta-\text{S})$ ] (2). The spectra of Lba and Lbc<sub>m</sub> show that all these modes are modified in terms of intensity and/or frequency. In particular, the intensity of the  $\text{C}_\beta(\text{pyrrole})-\text{C}_\alpha(\text{vinyl})$  stretching mode at  $\sim 1,000$   $\text{cm}^{-1}$  is strongly decreased upon  $\text{NO}_2$  binding (2). Moreover, new bands were found at 962, 1,042, and 1,086  $\text{cm}^{-1}$  in the Lbc<sub>m</sub> spectrum. Therefore, this frequency range strongly indicates a peripheral modification of heme upon nitration. (C) Bands observed at 400–450  $\text{cm}^{-1}$  represent major contributions of  $\text{C}_\beta(\text{pyrrole})-\text{C}_\alpha(\text{vinyl})$  and  $\text{C}_\beta(\text{pyrrole})-\text{Me}$  deformations (2). Lba showed a major band at 422  $\text{cm}^{-1}$  and a shoulder at 409  $\text{cm}^{-1}$ , whereas Lbc<sub>m</sub> exhibits a weak band at 424  $\text{cm}^{-1}$  and a new line at 447  $\text{cm}^{-1}$ . The porphyrin  $\nu_8$  mode is shifted from 345  $\text{cm}^{-1}$  for Lba to 347  $\text{cm}^{-1}$  for Lbc<sub>m</sub>. This upshift is diagnostic of an increased deformation of the porphyrin core in Lbc<sub>m</sub> (1). Shifts of the pyrrole deformation  $\gamma_{16}$  and  $\gamma_{21}$  modes (311/543  $\text{cm}^{-1}$  for Lba, and 297/551  $\text{cm}^{-1}$  for Lbc<sub>m</sub>, respectively) confirm this conformational change. It is interesting to note that the frequency of the propionate mode was not significantly different for Lba and Lbc<sub>m</sub> (377–378  $\text{cm}^{-1}$ ). In C, the bands marked with an asterisk result from the Raman cell itself.

1. Le Moigne C, et al. (2009) Redox effects on the coordination geometry and heme conformation of bis(*N*-methylimidazole) complexes of superstructured Fe-porphyrins. A spectroscopic study. *Inorg Chem* 48:10084–10092.
2. Desbois A, Henry Y, Lutz M (1984) Influence of peripheral substituents on the resonance Raman spectra of ferroporphyrin-2-methylimidazole complexes. *Biochim Biophys Acta* 785: 148–160.

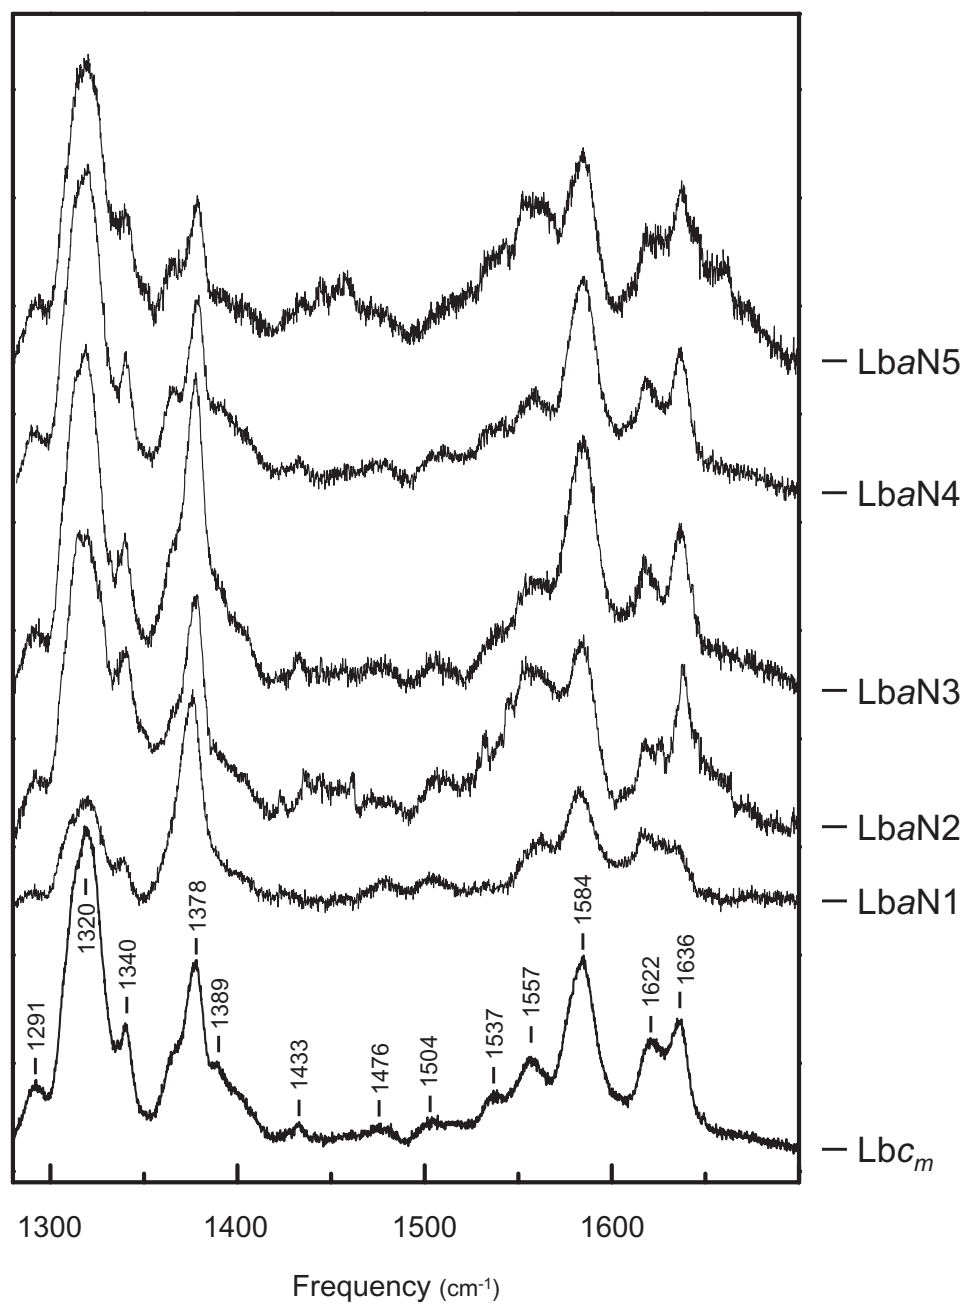

Fig. S5. High-frequency regions (1,280–1,700  $\text{cm}^{-1}$ ) of RR spectra of ferric Lbc<sub>m</sub> and LbaN derivatives, excited at 413.1 nm.

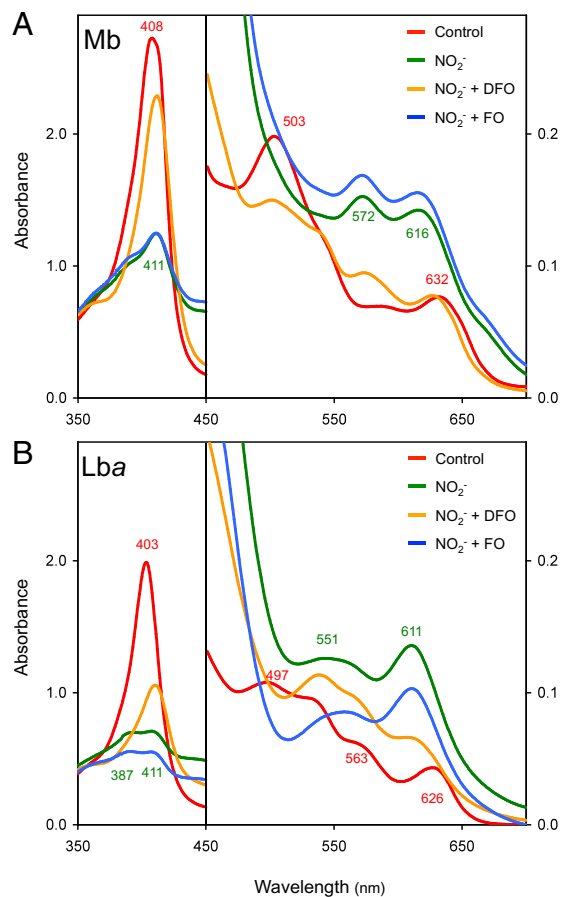

**Fig. S6.** Inhibitory effect of DFO on nitration of (A) Mb and (B) Lba after 48 h. Ferrioxamine (FO) had only a slight effect. The reaction mixtures contained 50 mM Na-phosphate buffer (pH 7.0), 200  $\mu$ M Mb or 150  $\mu$ M Lba and, where indicated, 200 mM NaNO<sub>2</sub>, 1 mM DFO, or 1 mM FO. Cyanide (10 mM) formed ferric cyanide complexes, which completely suppressed nitration. In contrast, this reaction was not inhibited by addition of superoxide dismutase, catalase, diethylenetriamine pentaacetic acid (DTPA), or Chelex resin (see text for details). The reaction was not inhibited either with 1–5 mM *p*-hydroxyphenylacetic acid, a more hydrophilic analog of Tyr, which is a good scavenger of the NO<sub>2</sub>• radical (1). Protein concentrations were standardized using extinction coefficients of 3.7 mM<sup>-1</sup>.cm<sup>-1</sup> at 630 nm for horse-heart Mb (2) and of 141 mM<sup>-1</sup>.cm<sup>-1</sup> at 405 nm for soybean Lba (3). Each experiment was repeated twice with identical results.

1. Bartesaghi S, et al. (2007) Protein tyrosine nitration in hydrophilic and hydrophobic environments. *Amino Acids* 32:501–515.
2. Bowen WJ (1949) The absorption spectra and extinction coefficients of myoglobin. *J Biol Chem* 179:235–245.
3. Appleby CA, Bergersen FJ (1980) *Methods for Evaluating Biological Nitrogen Fixation*, ed Bergersen FJ (John Wiley, Chichester), pp 315–335.

**Table S1.** Spectral characteristics of Lba and Lbc<sub>m</sub> of soybean nodules and of the Lba nitrated derivatives generated in vitro

| Isoprotein       | Lb <sup>2+</sup> |          | Lb <sup>2+</sup> NO |         |          | Lb <sup>2+</sup> nicotinate |         |          | Lb <sup>2+</sup> pyridine |     |         |          | Lb <sup>3+</sup> |          |     |     |     |     |     |
|------------------|------------------|----------|---------------------|---------|----------|-----------------------------|---------|----------|---------------------------|-----|---------|----------|------------------|----------|-----|-----|-----|-----|-----|
|                  | $\gamma$         | $\alpha$ | $\gamma$            | $\beta$ | $\alpha$ | $\gamma$                    | $\beta$ | $\alpha$ | $\gamma$                  | sh  | $\beta$ | $\alpha$ | sh               | $\gamma$ | sh  | CT  | sh  | sh  | CT  |
| Lba              | 427              | 555      | 414                 | 545     | 570      | 419                         | 525     | 554      | 417                       | 474 | 524     | 555      |                  | 404      |     | 496 | 531 | 563 | 625 |
| Lbc <sub>m</sub> | 422              | 557      | 413                 | 545     | 571      | 417                         | 525     | 555      | 415                       | 473 | 522     | 553      | 580              | 389      | 436 |     | wk  | wk  | 615 |
| LbaN1            | 425              | 557      | 414                 | 545     | 570      | 418                         | 524     | 554      | 415                       | 473 | 522     | 553      | 580              | 402      | 434 |     | wk  | wk  | 615 |
| LbaN2            | 424              | 557      | 414                 | 546     | 570      | 418                         | 525     | 554      | 415                       | 473 | 522     | 553      | 580              | 403      | 433 |     | wk  | wk  | 615 |
| LbaN3            | 424              | 557      | 414                 | 543     | 570      | 418                         | 526     | 554      | 415                       | 472 | 522     | 553      | 580              | 394      | 434 |     | wk  | wk  | 615 |
| LbaN4            | 423              | 557      | 414                 | 546     | 570      | 418                         | 525     | 554      | 415                       | 472 | 522     | 553      | 580              | 391      | 436 |     | wk  | wk  | 615 |
| LbaN5            | 423              | 557      | 413                 | 542     | 570      | 418                         | 524     | 554      | 414                       | 472 | 522     | 553      | 580              | 392      | 433 |     | wk  | wk  | 615 |

The major spectral features in the Soret ( $\gamma$ -band) and visible ( $\alpha$ - and  $\beta$ -bands) regions of the deoxyferrous and ferric Lb forms, as well as of some representative ferrous Lb complexes, are shown. The spectra of Lbc<sub>m</sub> were obtained separately for the Lbc<sub>1m</sub> and Lbc<sub>2m</sub>+Lbc<sub>3m</sub> isoproteins, but they are identical. CT, charge-transfer absorption band; sh, shoulder; wk, weak absorption band.

**Table S2. High-resolution MS analysis of hemes from soybean Lbs**

| Protein                  | Mol mass (found) | Mol mass (calc) | Mol formula                                                      | Fragment loss                                                                             |
|--------------------------|------------------|-----------------|------------------------------------------------------------------|-------------------------------------------------------------------------------------------|
| <b>Lba</b> , Lbc, Lbd    | <b>616.1769</b>  | <b>616.1768</b> | C <sub>34</sub> H <sub>32</sub> Fe N <sub>4</sub> O <sub>4</sub> | —                                                                                         |
|                          | 557.1630         | 557.1634        | C <sub>32</sub> H <sub>29</sub> Fe N <sub>4</sub> O <sub>3</sub> | CH <sub>2</sub> COOH                                                                      |
|                          | 498.1498         | 498.1501        | C <sub>30</sub> H <sub>26</sub> Fe N <sub>4</sub>                | 2 CH <sub>2</sub> COOH                                                                    |
| <b>Lbam</b> , Lbcm, Lbdm | <b>661.1618</b>  | <b>661.1618</b> | C <sub>34</sub> H <sub>31</sub> Fe N <sub>5</sub> O <sub>6</sub> | —                                                                                         |
|                          | 644.1586         | 644.1591        | C <sub>34</sub> H <sub>30</sub> Fe N <sub>5</sub> O <sub>5</sub> | OH                                                                                        |
|                          | 629.1338         | 629.1356        | C <sub>33</sub> H <sub>27</sub> Fe N <sub>5</sub> O <sub>5</sub> | OH CH <sub>3</sub>                                                                        |
|                          | 627.1559         | 627.1563        | C <sub>34</sub> H <sub>29</sub> Fe N <sub>5</sub> O <sub>4</sub> | 2 OH                                                                                      |
|                          | 615.1684         | 615.1689        | C <sub>34</sub> H <sub>31</sub> Fe N <sub>4</sub> O <sub>4</sub> | NO <sub>2</sub>                                                                           |
|                          | 602.1481         | 602.1485        | C <sub>32</sub> H <sub>28</sub> Fe N <sub>5</sub> O <sub>4</sub> | CH <sub>2</sub> COOH                                                                      |
|                          | 600.1438         | 600.1455        | C <sub>33</sub> H <sub>28</sub> Fe N <sub>4</sub> O <sub>4</sub> | NO <sub>2</sub> CH <sub>3</sub>                                                           |
|                          | 584.1375         | 584.1380        | C <sub>32</sub> H <sub>26</sub> Fe N <sub>5</sub> O <sub>3</sub> | CH <sub>2</sub> COOH H <sub>2</sub> O                                                     |
|                          | 571.1297         | 571.1301        | C <sub>31</sub> H <sub>25</sub> Fe N <sub>5</sub> O <sub>3</sub> | CH <sub>2</sub> CH <sub>2</sub> COOH OH                                                   |
|                          | 556.1553         | 556.1556        | C <sub>32</sub> H <sub>28</sub> Fe N <sub>4</sub> O <sub>2</sub> | NO <sub>2</sub> CH <sub>2</sub> COOH                                                      |
|                          | 542.1396         | 542.1400        | C <sub>31</sub> H <sub>26</sub> Fe N <sub>4</sub> O <sub>2</sub> | NO <sub>2</sub> CH <sub>2</sub> CH <sub>2</sub> COOH                                      |
|                          | 525.1235         | 525.1220        | C <sub>30</sub> H <sub>23</sub> Fe N <sub>5</sub> O              | 2 CH <sub>2</sub> COOH H <sub>2</sub> O                                                   |
|                          | 512.1157         | 512.1142        | C <sub>29</sub> H <sub>22</sub> Fe N <sub>5</sub> O              | CH <sub>2</sub> COOH CH <sub>2</sub> CH <sub>2</sub> COOH OH                              |
|                          | 496.1336         | 496.1345        | C <sub>30</sub> H <sub>24</sub> Fe N <sub>4</sub>                | NO <sub>2</sub> CH <sub>2</sub> COOH COOH CH <sub>3</sub>                                 |
|                          | 483.1259         | 483.1267        | C <sub>29</sub> H <sub>23</sub> Fe N <sub>4</sub>                | NO <sub>2</sub> CH <sub>2</sub> COOH CH <sub>2</sub> CH <sub>2</sub> COOH                 |
|                          | 468.1025         | 468.1032        | C <sub>28</sub> H <sub>20</sub> Fe N <sub>4</sub>                | NO <sub>2</sub> CH <sub>2</sub> COOH CH <sub>2</sub> CH <sub>2</sub> COOH CH <sub>3</sub> |

Molecular ions of hemes are highlighted in boldface. calc, calculated monoisotopic mass.

**Table S3. Assignments of proton resonances of ferric Lba-cyanide and ferric Lbcm-cyanide complexes**

| Proton            | Ferric Lba-cyanide | Ferric Lbcm-cyanide |               |
|-------------------|--------------------|---------------------|---------------|
|                   |                    | I                   | II            |
| 1-Me              | 16.9               | 13.5                | 12.8          |
| 3-Me              | 10.3               | 6.2*                | 6.0*          |
| 5-Me              | 19.2               | 25.2                | 25.0          |
| 8-Me              | 7.7                | 8.0*                | 7.9*          |
| 2-Vinyl- $\alpha$ | 16.2               | 19.8                | 19.2          |
| 2-Vinyl- $\beta$  | -4.8, -6.7         | -7.0, -9.0          | -7.2, -9.2    |
| 4-Vinyl- $\alpha$ | NA                 | NA                  | NA            |
| 4-Vinyl- $\beta$  | NA                 | NA                  | NA            |
| 6-Prop- $\alpha$  | 13.0, 11.4         | 15.2, 12.1          | 15.7, 11.2    |
| 6-Prop- $\beta$   | 0.4, -0.7          | 0.5, -0.5           | 0.7, -0.5     |
| 7-Prop- $\alpha$  | 10.0, 9.1          | 10.2, 7.9           | 9.9, 7.8      |
| 7-Prop- $\beta$   | 2.3, 1.7           | NA                  | NA            |
| meso- $\alpha$    | 1.4                | -1.3                | -1.7          |
| meso- $\beta$     | 4.5                | 5.8*                | 6.0*          |
| meso- $\gamma$    | NA                 | NA                  | NA            |
| meso- $\delta$    | 2.4                | 1.7                 | 1.5           |
| Me order          | 5 > 1 > 3 > 8      | 5 > 1 > 8 > 3       | 5 > 1 > 8 > 3 |
| av Me             | 13.5               | 13.2                | 12.9          |

Chemical shifts are given in parts per million. NA, not assigned; Prop, propionate.

\*Tentative assignment.
